# Supplementary material for: Functional Annotation of ESR1 Gene Fusions in Estrogen Receptor-Positive Breast Cancer
Source: Cell Rep. Author manuscript; Available in PMC 2018 Oct 4. (PMC6171747; doi:10.1016/j.celrep.2018.07.009)
Supplement: Suppl. Figures [file NIHMS985142-supplement-Suppl__Figures.pdf]

## Supplemental Information

### Functional Annotation of *ESR1* Gene Fusions in Estrogen Receptor-Positive Breast Cancer

Jonathan T. Lei, Jieya Shao, Jin Zhang, Michael Iglesia, Doug W. Chan, Jin Cao, Meenakshi Anurag, Purba Singh, Xiaping He, Yoshimasa Kosaka, Ryoichi Matsunuma, Robert Crowder, Jeremy Hoog, Chanpheng Phommaly, Rodrigo Goncalves, Susana Ramalho, Raquel Mary Rodrigues Peres, Nindo Punturi, Cheryl Schmidt, Alex Bartram, Eric Jou, Vaishnavi Devarakonda, Kimberly R. Holloway, W. Victoria Lai, Oliver Hampton, Anna Rogers, Ethan Tobias, Poojan A. Parikh, Sherri R. Davies, Shunqiang Li, Cynthia X. Ma, Vera J. Suman, Kelly K. Hunt, Mark A. Watson, Katherine A. Hoadley, E. Aubrey Thompson, Xi Chen, Shyam M. Kavuri, Chad J. Creighton, Christopher A. Maher, Charles M. Perou, Svasti Haricharan, and Matthew J. Ellis

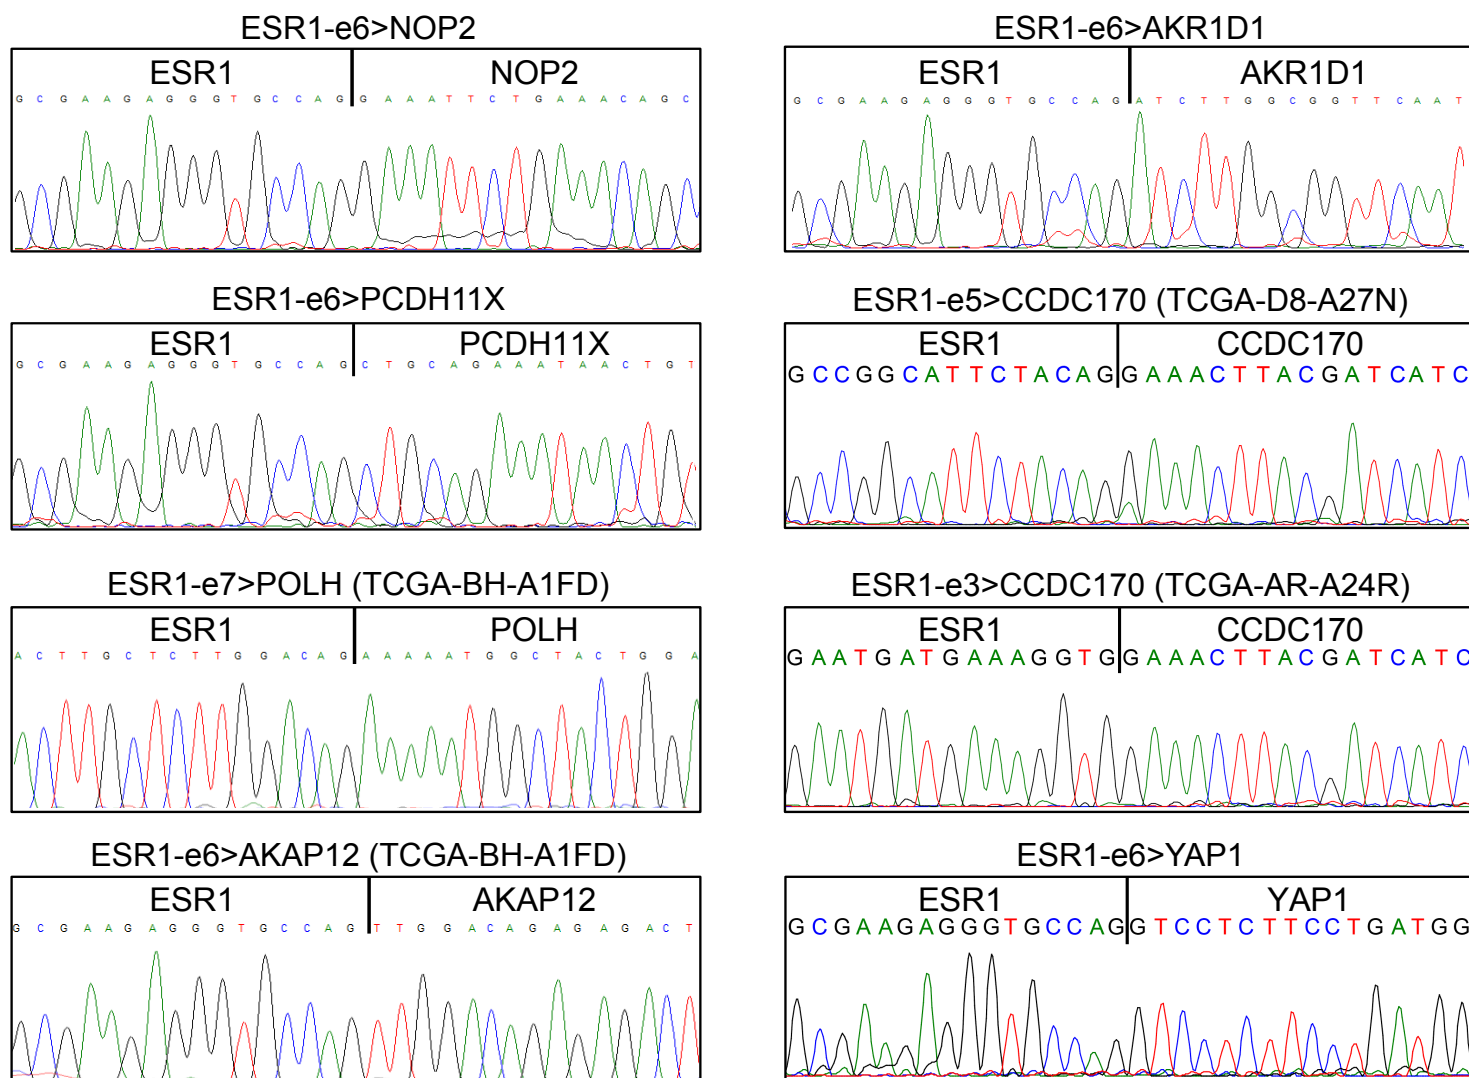

**Figure S1 related to Figure 1. PCR validation of *ESR1* fusions.** cDNAs were synthesized from patient RNA or WHIM18 tumor RNA, followed by PCR amplification and sanger sequencing. Black line indicates fusion break point. Sequences contributed by *ESR1* are to the left of the breakpoint and from fusion partner sequences to the right of the breakpoint.

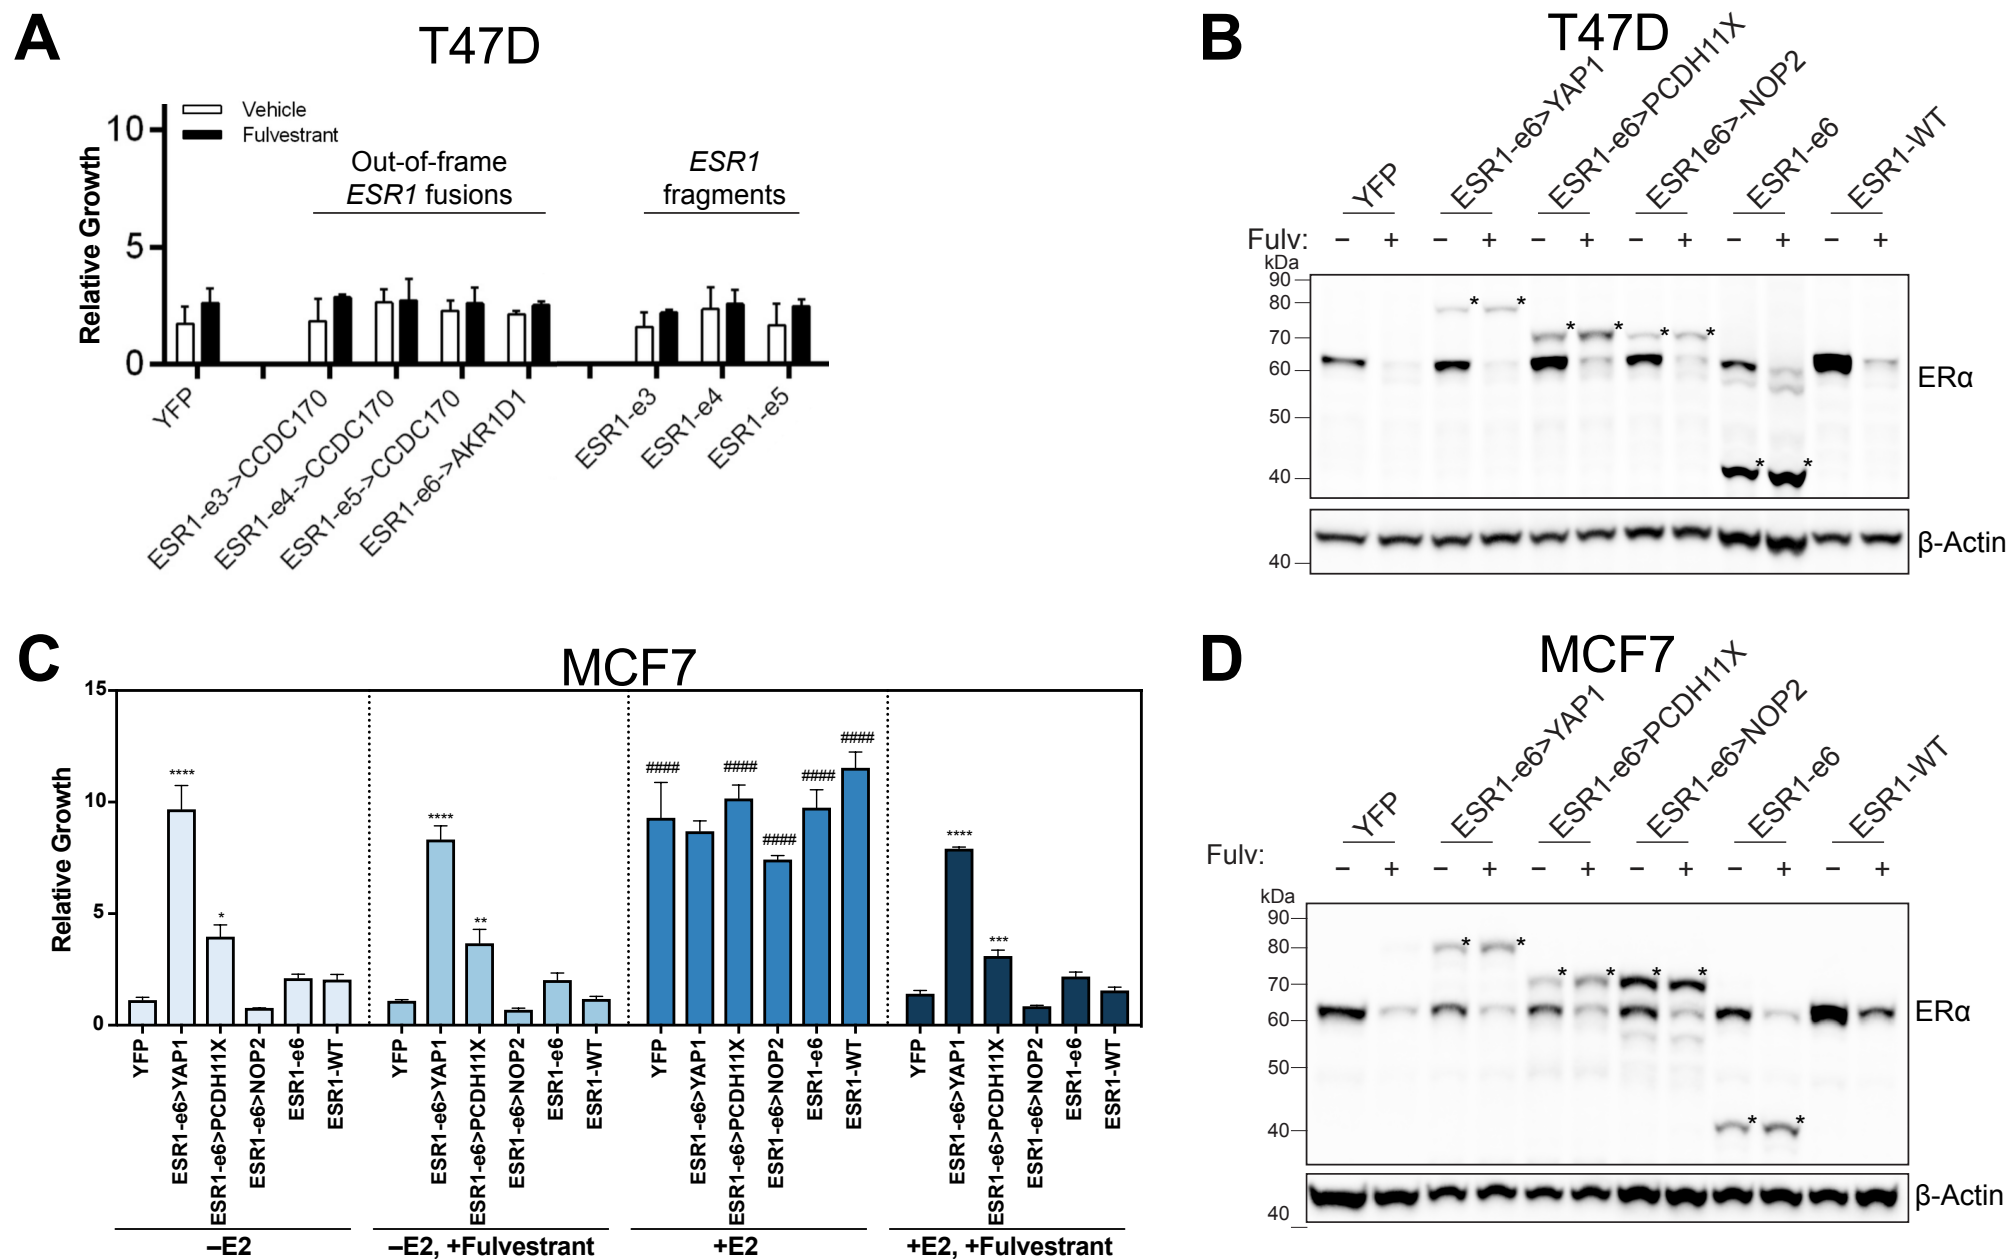

**Figure S2 related to Figure 2. Out-of-frame *ESR1* fusions lack estrogen-independent growth promoting ability and in-frame *ESR1* fusions from endocrine refractory disease promotes estrogen-independent and fulvestrant-resistant growth.** (A) Bar graphs depicting growth of hormone deprived stable out-of-frame *ESR1* fusion or *ESR1* fragments expressing T47D cells in the absence (open bars) or presence of fulvestrant (black bars). Data are average of 3 independent experiments  $\pm$  SEM. (B) Western blotting of ER $\alpha$  in hormone deprived stable T47D cells treated in the absence of presence of fulvestrant. Asterisks denote *ESR1* fusion or ESR1-e6.  $\beta$ -Actin used as loading control. (C) Similar to Figure 2C, except hormone deprived stable MCF7 cells expressing the indicated constructs were used. Significance was determined based on ANOVA followed by Tukey's post-hoc test for multiple comparisons correction for ESR1-e6>YAP1 or ESR1-e6>PCDH11X fusion expressing cells compared to all other stable T47D cells within a treatment group (\*\*\*\*  $p < 0.0001$ , \*\*  $p < 0.01$ , \*  $p < 0.05$ ) or using two-way ANOVA followed by Bonferonni's post-hoc test for multiple comparisons correction for each construct after E2 stimulation, -E2 vs +E2 (####  $p < 0.0001$ ). Data are mean  $\pm$  SEM of three independent experiments. (D) Similar to (B) except hormone deprived stable MCF7 cells were used.

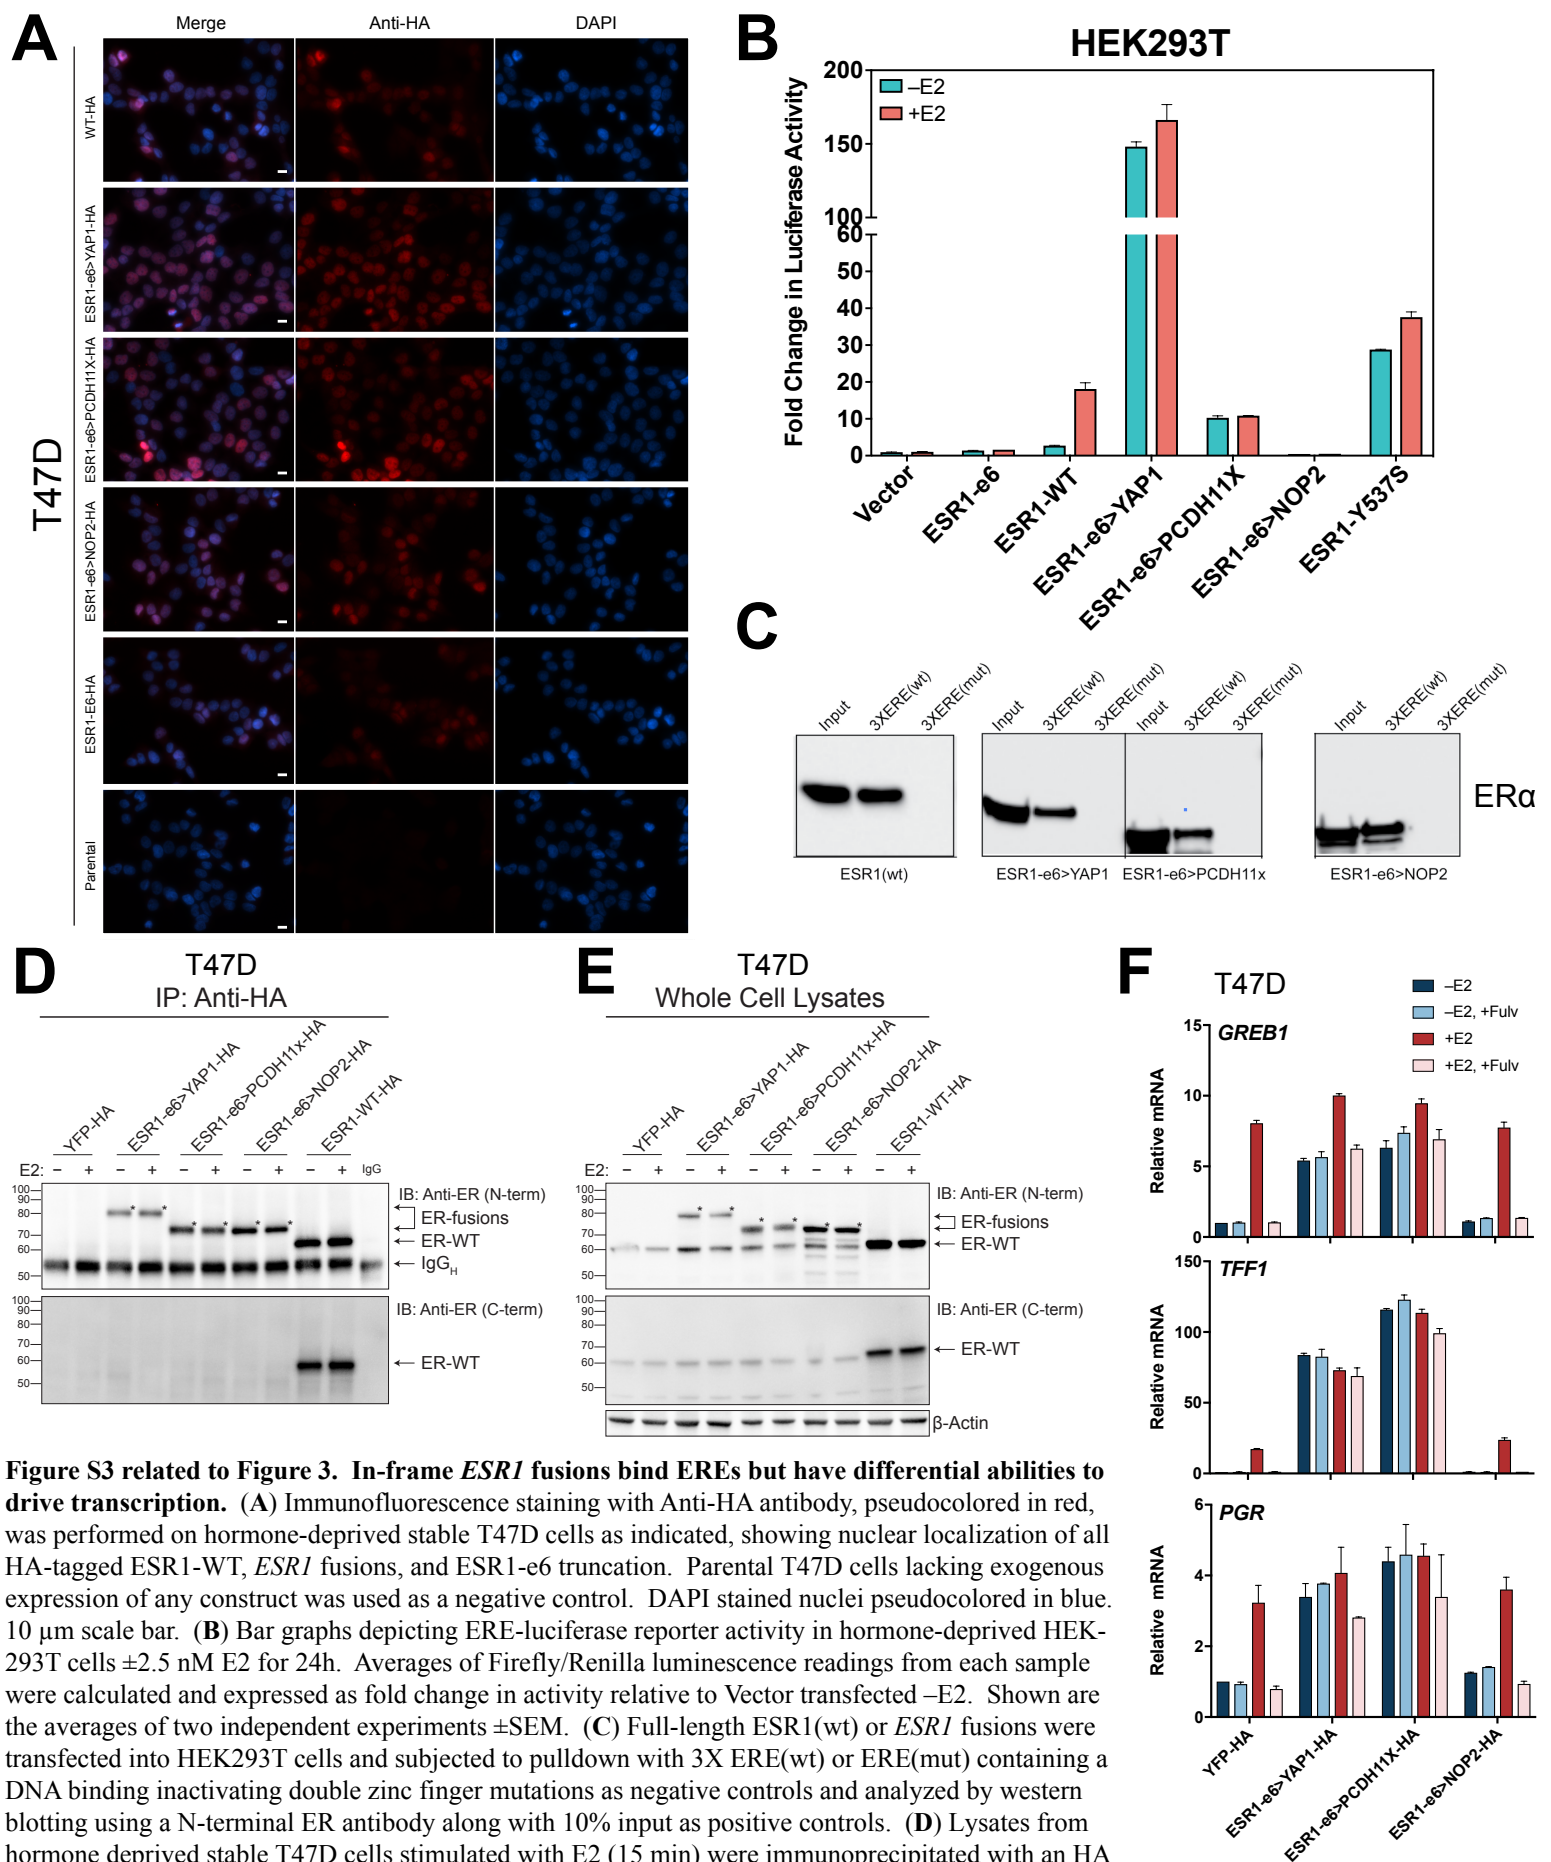

**Figure S3 related to Figure 3. In-frame *ESR1* fusions bind EREs but have differential abilities to drive transcription.** (A) Immunofluorescence staining with Anti-HA antibody, pseudocolored in red, was performed on hormone-deprived stable T47D cells as indicated, showing nuclear localization of all HA-tagged ESR1-WT, *ESR1* fusions, and ESR1-e6 truncation. Parental T47D cells lacking exogenous expression of any construct was used as a negative control. DAPI stained nuclei pseudocolored in blue. 10  $\mu$ m scale bar. (B) Bar graphs depicting ERE-luciferase reporter activity in hormone-deprived HEK-293T cells  $\pm$  2.5 nM E2 for 24h. Averages of Firefly/Renilla luminescence readings from each sample were calculated and expressed as fold change in activity relative to Vector transfected –E2. Shown are the averages of two independent experiments  $\pm$  SEM. (C) Full-length ESR1(wt) or *ESR1* fusions were transfected into HEK293T cells and subjected to pulldown with 3X ERE(wt) or ERE(mut) containing a DNA binding inactivating double zinc finger mutations as negative controls and analyzed by western blotting using a N-terminal ER antibody along with 10% input as positive controls. (D) Lysates from hormone deprived stable T47D cells stimulated with E2 (15 min) were immunoprecipitated with an HA antibody or rabbit IgG control then blotted with N-terminal ER $\alpha$  antibody demonstrating successful IP of fusion ER (asterisks) and WT-ER (top panel). Blotting with a C-terminal ER $\alpha$  antibody that recognizes only WT-ER detects strong co-IP with WT-ER but lack of WT-ER co-IP with ER fusions. (E) Whole cell lysates (inputs) analyzed by Western blot from (C) with N- and C-terminal ER antibodies along with  $\beta$ -Actin control. (F) Same as Figure 3D, except –E2 and +E2 conditions shown for all cell lines analyzed.

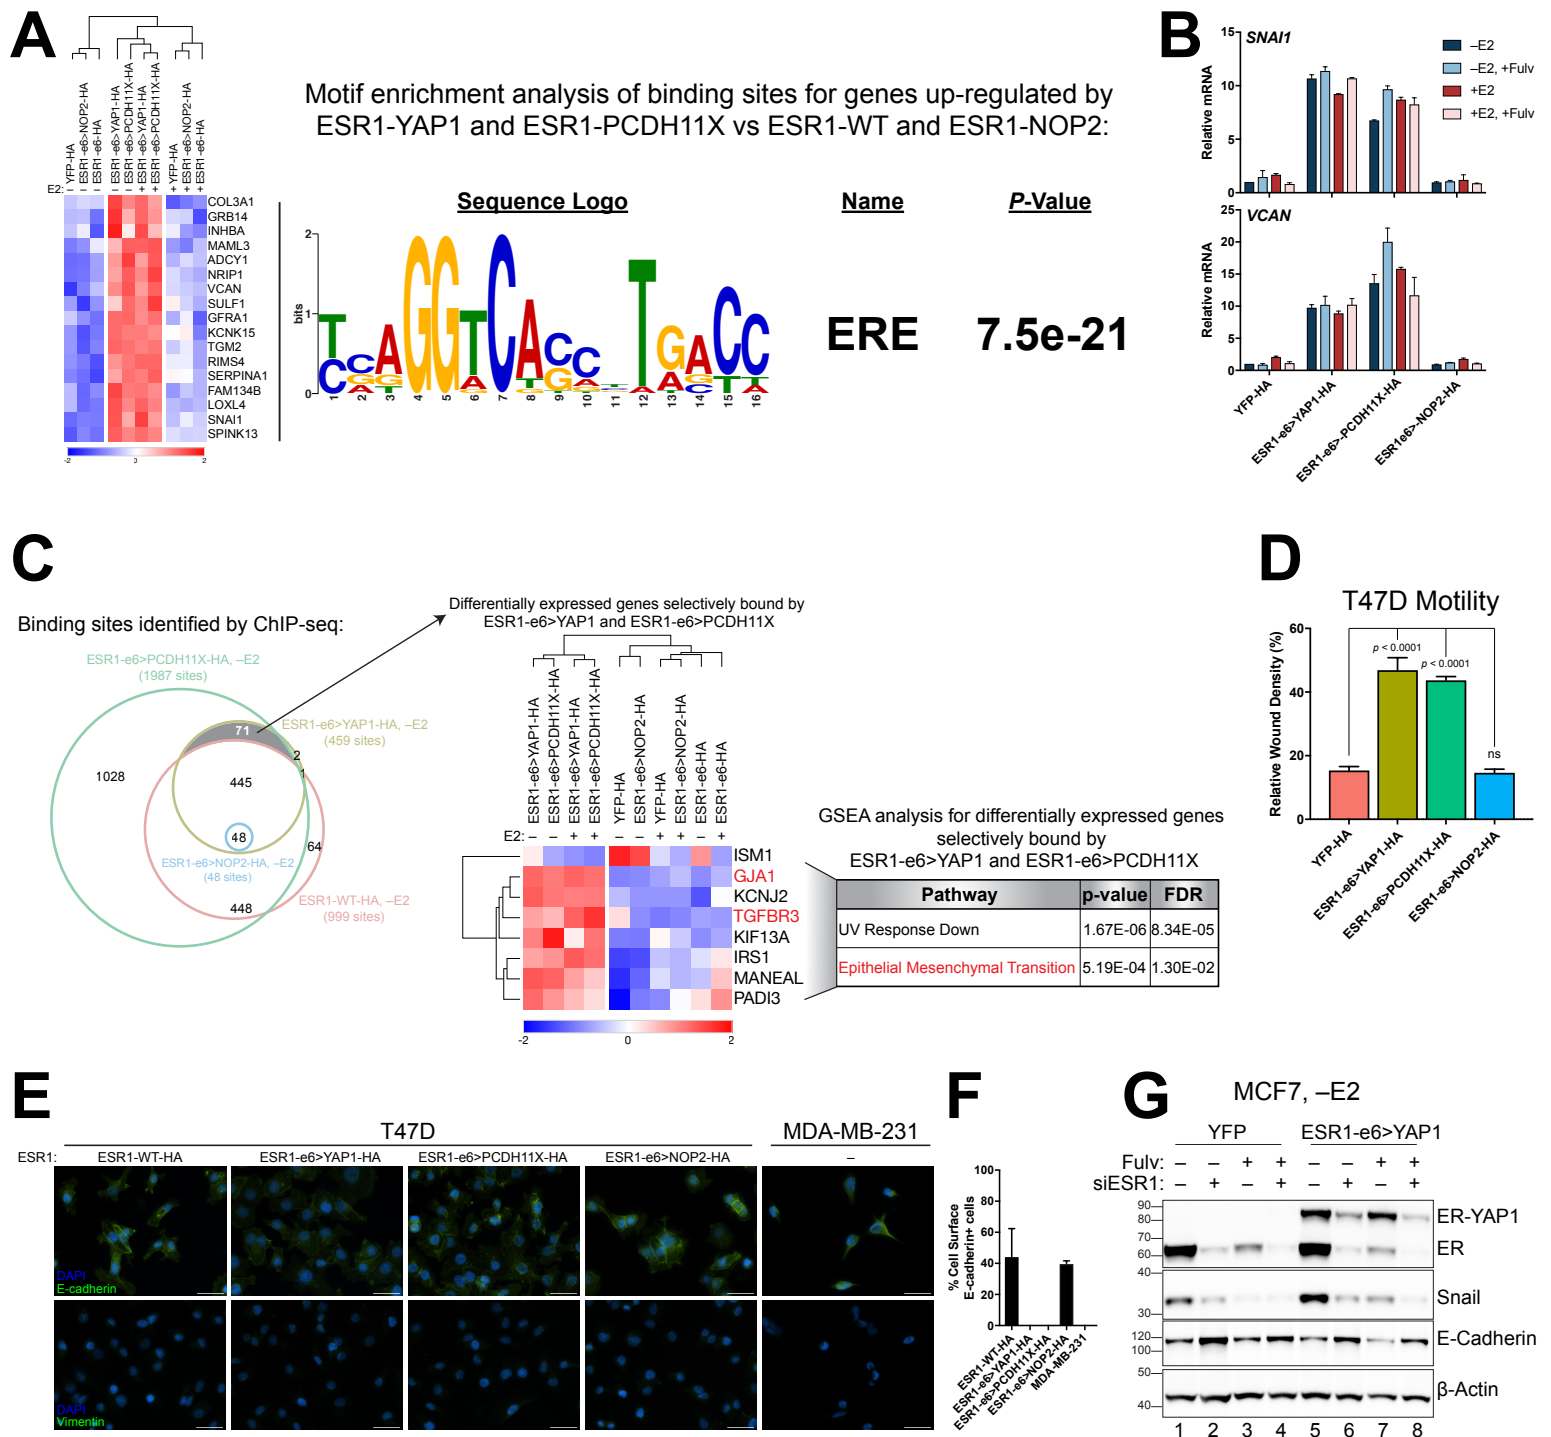

**Figure S4 related to Figure 4. Active *ESR1* fusions promote metastasis by up-regulating an EMT-like transcriptional program. (A)** MEME-ChIP motif enrichment was performed using 100 bp sequences centered around each peak's summit (derived from Table S3) for genes strongly upregulated by the active ESR1-e6>YAP1 and ESR1-e6>PCDH11X fusions (Figure 4A) demonstrating ERE motif enrichment with overall  $P$ -value of  $7.5e-21$ . **(B)** Same as in Figure 4C, except  $\pm$ E2 conditions shown for all T47D cell lines analyzed. Data are averages of two independent experiments  $\pm$ SEM. **(C)** Hierarchical clustering was performed on differentially expressed genes within 1Mb of 71 selectively bound sites by ESR1-e6>YAP1 and ESR1-e6>PCDH11X (shaded gray overlap). GSEA hallmark pathway analysis for these genes demonstrates enrichment for UV response and EMT hallmark pathways. *GJA1* and *TGFB3* (shown in red) contributed to EMT pathway enrichment. Scale bar indicates row Z-score. **(D)** Quantification of relative wound density 72h post wounding from Figure 4E. Data are averages from three independent experiments  $\pm$ SEM. **(E)** Representative immunofluorescence images of two independent experiments from hormone deprived stable T47D cells expressing constructs as indicated and hormone deprived MDA-MB-231 stained with E-cadherin and vimentin antibodies pseudocolored in green and DAPI stained nuclei pseudocolored in blue. 50  $\mu$ m scale bar. **(F)** Bar graphs depicting average number of cell surface E-cadherin positive (E-cadherin+) cells quantified from images in (E). Data are averages of two independent experiments  $\pm$ SEM. **(G)** Same as in Figure 4F, except using stable MCF7 cell lines.

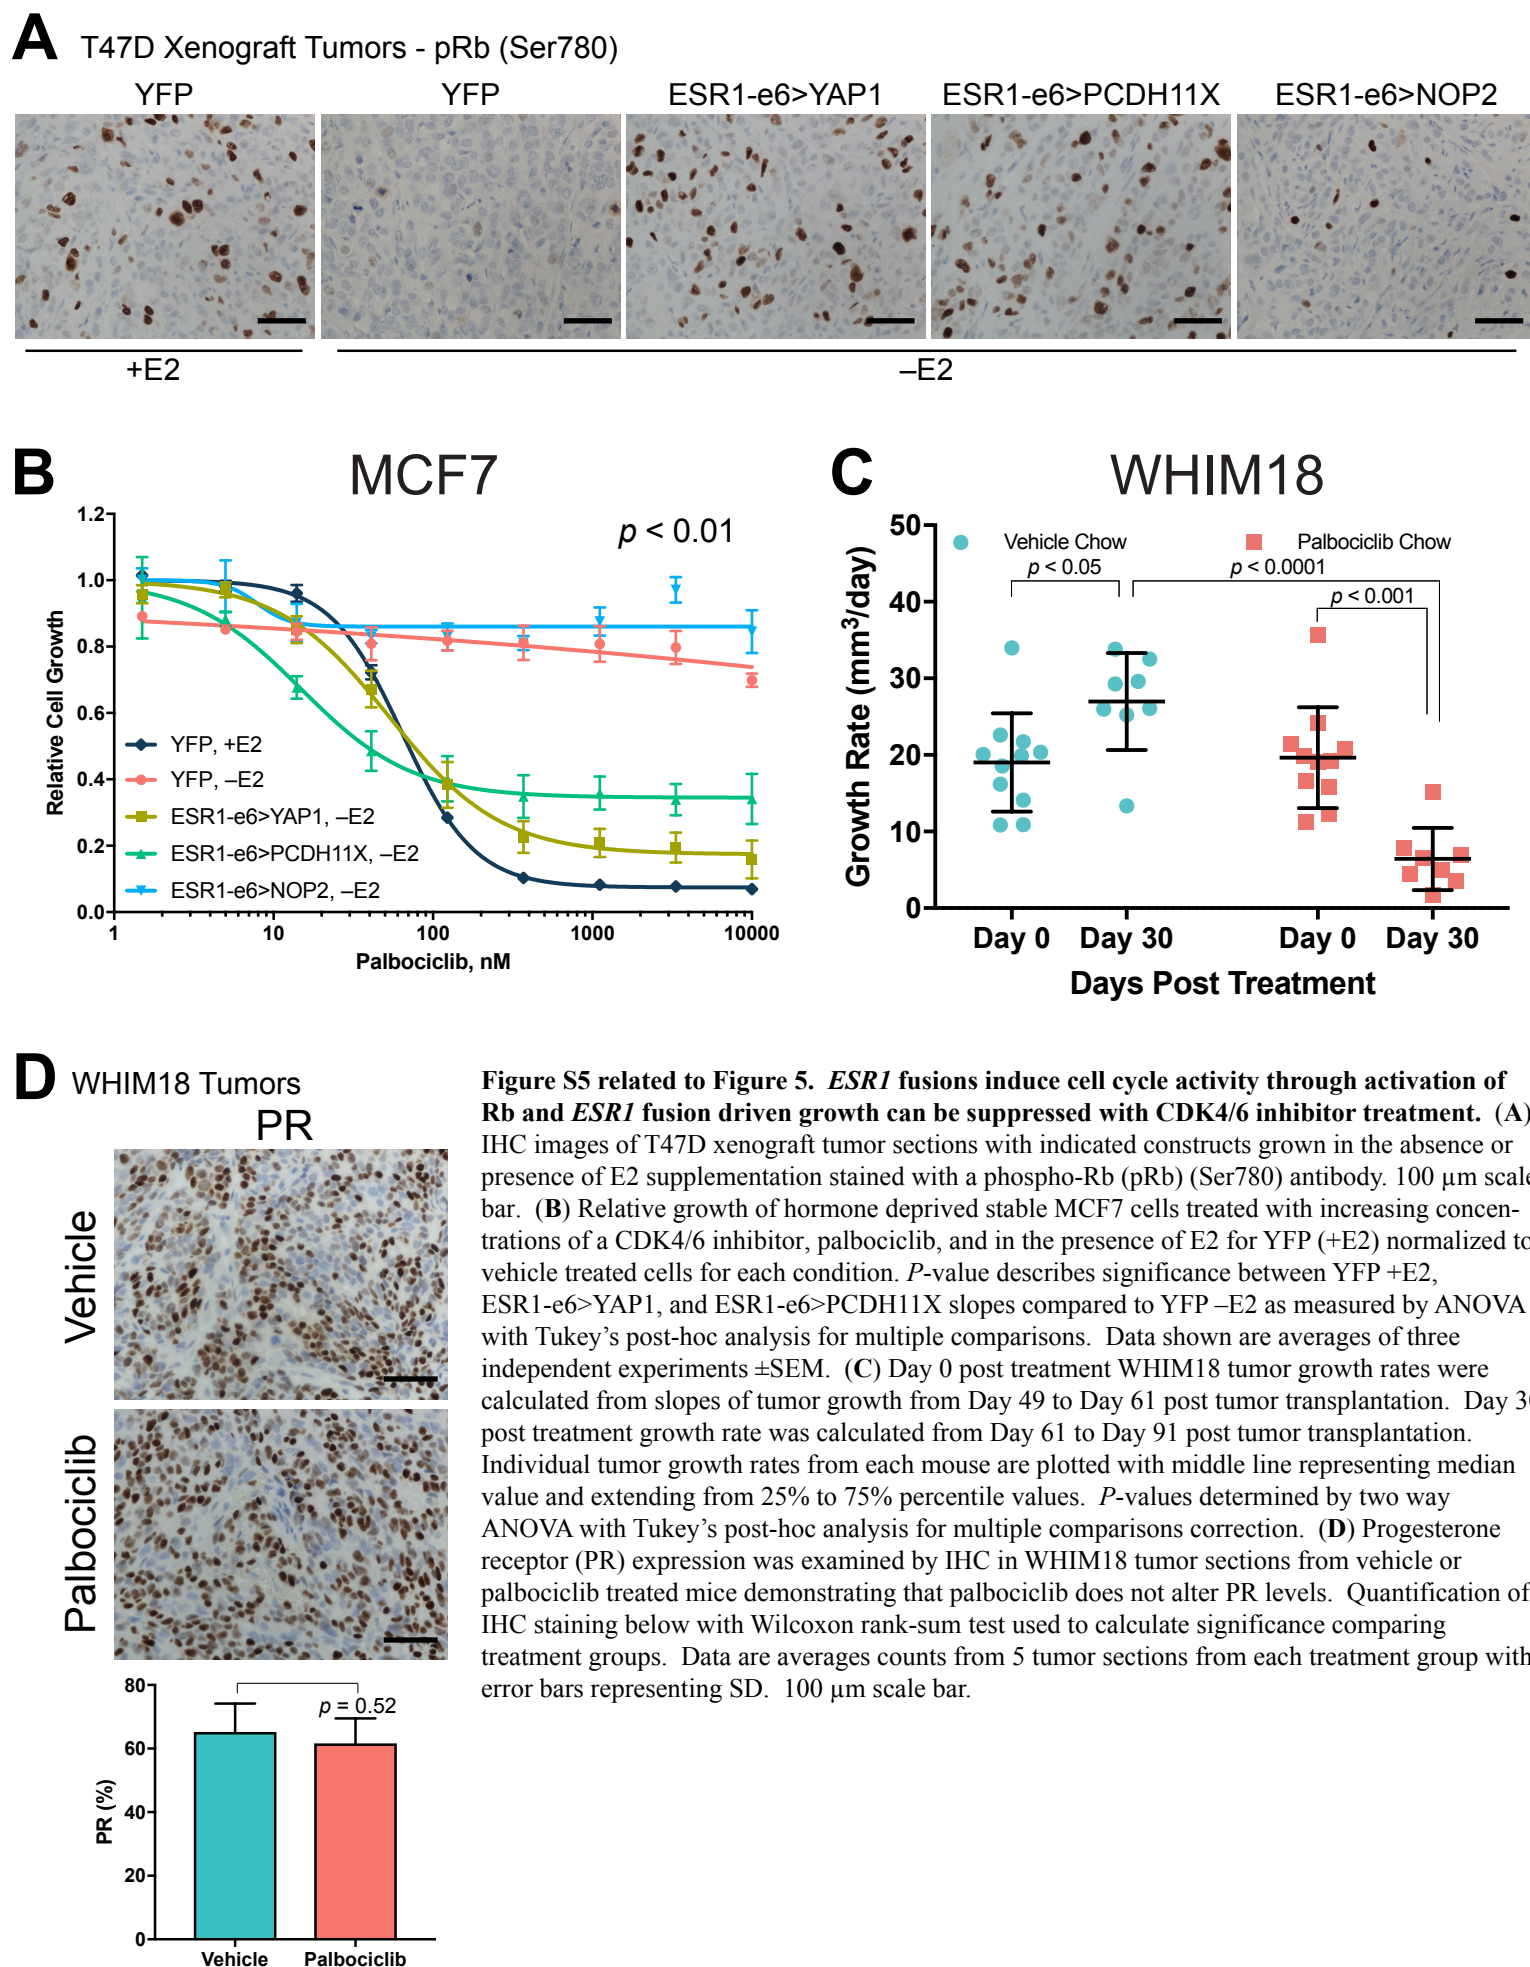

| N-term<br>ESR1<br>aa (5'<br>exons) | Study (Sample)          | Fusion Transcript | Source                            | Frame            | Intra-<br>OR<br>Inter-<br>Chr | Stage | PAM50 | TP53           | BRCA2   | PIK3CA        | AKT1 | PTEN | KRAS | MLL3  | GATA3    | MAP3K1 | CDH1 | Platform |
|------------------------------------|-------------------------|-------------------|-----------------------------------|------------------|-------------------------------|-------|-------|----------------|---------|---------------|------|------|------|-------|----------|--------|------|----------|
| (e2)                               | TCGA-E9-A1NA            | ESR1->C6orf211    | 1° tumor                          | Out of-<br>frame | INTRA                         | IIA   | LumB  | WT             | WT      | WT            | WT   | WT   | WT   | WT    | D335Gfs* | WT     | WT   | WES      |
|                                    | TCGA-A2-A0YG            | ESR1->CCDC170     | 1° tumor                          | Out-of-<br>frame | INTRA                         | IIIC  | LumB  | X125<br>splice | WT      | AMP           | WT   | DEL  | WT   | WT    | WT       | WT     | WT   | WES      |
|                                    | TCGA-A2-A0CT            | ESR1->CCDC170     | 1° tumor                          | Out-of-<br>frame | INTRA                         | IIA   | LumB  | WT             | WT      | WT            | WT   | WT   | WT   | WT    | WT       | WT     | WT   | WES      |
| 151aa<br>(e3)                      | TCGA-AR-A24R            | ESR1->CCDC170     | 1° tumor                          | Out-of-<br>frame | INTRA                         | IIIA  | LumB  | WT             | WT      | WT            | WT   | WT   | WT   | WT    | WT       | WT     | WT   | WES      |
|                                    | TCGA-AQ-A04L            | ESR1->UTRN        | 1° tumor                          | Out-of-<br>frame | INTRA                         | IIA   | LumA  | H193R          | WT      | WT            | WT   | WT   | WT   | WT    | WT       | WT     | WT   | WES      |
|                                    | NeoAI Trials<br>(17387) | ESR1->CCDC170     | 1° tumor                          | Out-of-<br>frame | INTRA                         | IIA   | LumB  | WT             | L2745fs | N/A           | WT   | WT   | WT   | WT    | WT       | WT     | WT   | WES      |
| 214aa<br>(e4)                      | TCGA-BH-A1FD            | ESR1->CCDC170     | 1° tumor                          | Out-of-<br>frame | INTRA                         | I     | LumB  | WT             | WT      | WT            | WT   | WT   | WT   | WT    | WT       | WT     | WT   | WES      |
| 215aa<br>(e4)                      | TCGA-BH-A1EV            | ESR1->BNC2        | 1° tumor                          | Out-of-<br>frame | INTER                         | IIIA  | Her2  | WT             | AMP     | WT            | WT   | WT   | AMP  | WT    | WT       | WT     | WT   | WES      |
|                                    | TCGA-A8-A06Q            | ESR1->USP25       | 1° tumor                          | Out-of-<br>frame | INTER                         | IIIA  | LumB  | C238Y          | WT      | H1047R        | WT   | WT   | WT   | WT    | WT       | WT     | WT   | WES      |
| 253aa<br>(e5)                      | TCGA-D8-A27N            | ESR1->CCDC170     | 1° tumor                          | Out-of-<br>frame | INTRA                         | IIIA  | LumB  | R175H          | WT      | AMP           | WT   | WT   | WT   | WT    | WT       | WT     | WT   | WES      |
|                                    | NeoAI Trials<br>(16002) | ESR1->GPR126      | 1° tumor                          | Out-of-<br>frame | INTRA                         | IIA   | LumB  | WT             | WT      | D454N         | WT   | DEL  | WT   | WT    | WT       | WT     | WT   | WES      |
|                                    | NeoAI Trials<br>(814)   | ESR1->PCMT1       | 1° tumor                          | Out-of-<br>frame | INTRA                         | IIB   | LumB  | WT             | WT      | WT            | WT   | WT   | WT   | R4139 | WT       | WT     | WT   | WES      |
|                                    | NeoAI Trials<br>(16315) | ESR1->CCDC170     | 1° tumor                          | Out-of-<br>frame | INTRA                         | IIIB  | LumB  | WT             | WT      | GNR106<br>del | WT   | WT   | WT   | WT    | WT       | WT     | WT   | WES      |
| 365aa<br>(e6)                      | NeoAI Trials<br>(16986) | ESR1->AKR1D1      | 1° tumor                          | Out-of-<br>frame | INTER                         | N/A   | LumB  | WT             | WT      | WT            | WT   | WT   | WT   | T316S | WT       | WT     | WT   | WES      |
|                                    | NeoAI Trials<br>(17502) | ESR1->NOP2        | 1° tumor                          | In-frame         | INTER                         | N/A   | LumB  | H179R          | WT      | WT            | WT   | WT   | WT   | WT    | WT       | WT     | WT   | WES      |
|                                    | Late Stage<br>(WHIM18)  | ESR1->YAP1        | PDX from<br>metastatic<br>patient | In-frame         | INTER                         | IV    | LumB  | WT             | WT      | E545K         | WT   | WT   | WT   | WT    | WT       | WT     | WT   | WGS      |
|                                    | Late Stage (360)        | ESR1->PCDH11X     | Chest wall<br>recurrence          | In-frame         | INTER                         | IV    | LumB  | N/A            | N/A     | N/A           | N/A  | N/A  | N/A  | N/A   | N/A      | N/A    | N/A  | N/A      |
|                                    | TCGA-BH-A1FD            | ESR1->AKAP12      | 1° tumor                          | In-frame         | INTRA                         | I     | LumB  | WT             | WT      | WT            | WT   | WT   | WT   | WT    | WT       | WT     | WT   | WES      |
| 412aa<br>(e7)                      | TCGA-BH-A1FD            | ESR1->POLH        | 1° tumor                          | In-frame         | INTRA                         | I     | LumB  | WT             | WT      | WT            | WT   | WT   | WT   | WT    | WT       | WT     | WT   | WES      |

  

| C-term<br>ESR1<br>aa (3'<br>exons) | Study (Sample) | Fusion Transcript | Source   | Frame            | Intra-<br>OR<br>Inter-<br>Chr | Stage | PAM50 | TP53  | BRCA2 | PIK3CA | AKT1 | PTEN | KRAS | MLL3 | GATA3 | MAP3K1 | CDH1 | Platform |
|------------------------------------|----------------|-------------------|----------|------------------|-------------------------------|-------|-------|-------|-------|--------|------|------|------|------|-------|--------|------|----------|
| (e9)                               | TCGA-A8-A08I   | AKAP7->ESR1       | 1° tumor | Out-of-<br>frame | INTRA                         | IIA   | LumB  | Y163C | DEL   | WT     | DEL  | WT   | WT   | WT   | WT    | WT     | WT   | WES      |
| (e10)                              | TCGA-A8-A08I   | AKAP7->ESR1       | 1° tumor | Out-of-<br>frame | INTRA                         | IIA   | LumB  | Y163C | DEL   | WT     | DEL  | WT   | WT   | WT   | WT    | WT     | WT   | WES      |

**Table S1. Related to Figure 1 and Table S2. Summary of *ESR1* fusion transcripts from ER+ samples.** The TCGA dataset includes 728 breast cancer patients (Ciriello et al., 2015). The NeoAI Trials dataset includes 41 aromatase inhibitor sensitive neoadjuvant primary samples, 40 aromatase inhibitor resistant neoadjuvant primary samples (Ellis et al., 2011; Olson et al., 2009). The Late Stage dataset includes 25 advanced ER+ endocrine therapy refractory, metastatic biopsy samples (Table S2) and includes WHIM18, a PDX derived from a metastatic biopsy from a patient with endocrine therapy resistant disease (Li et al., 2013). ChimeraScan (Iyer et al., 2011) and INTEGRATE (Zhang et al., 2016) were used to detect gene fusions in RNA-seq data and in some cases with whole genome data. *ESR1* fusions are presented according to the number of 5' exons (top portion of table) or 3' exons (bottom portion of table) retained in each of the indicated *ESR1* fusions with corresponding amino acids (aa). The first two 5' exons of *ESR1* (e2) are non-coding exons. The -> indicates direction of fusion transcript from 5' to 3' direction. Also shown are mutational status of genes found to be significantly mutated in ER+ breast cancer representing common risk factors for hormone receptor positive breast cancer (Ellis et al., 2012) and platform used to determine mutational status (WES, whole-exome sequencing; WGS, whole-genome sequencing).

| Oligonucleotides                                                |                      |                         |
|-----------------------------------------------------------------|----------------------|-------------------------|
| mRNA-qPCR primers:                                              | Reference:           | Identifier:             |
| <i>GREB1</i> : Forward, 5'-CAAAGAATAACCTGTTGGCCCTGC-3'          | This paper           | N/A                     |
| <i>GREB1</i> : Reverse, 5'-GACATGCCTGCGCTCTCATACTTA-3'          |                      |                         |
| <i>TFF1</i> : Forward, 5'-GTGTCACGCCCTCCAGT-3'                  | This paper           | N/A                     |
| <i>TFF1</i> : Reverse, 5'-GGACCCACGAACGGTG-3'                   |                      |                         |
| <i>PGR</i> : Forward, 5'-CTTAATCAACTAGGCGAGAG-3'                | This paper           | N/A                     |
| <i>PGR</i> : Reverse, 5'-AAGCTCATCCAAGAATACTG-3'                |                      |                         |
| <i>SNAI1</i> : Forward, 5'-TCGGAAGCCTAACTACAGCGA-3'             | This paper           | N/A                     |
| <i>SNAI1</i> : Reverse, 5'-AGATGAGCATTGGCAGCGAG-3'              |                      |                         |
| <i>VCAN</i> : Forward, 5'-CCAGTGTGAACTTGATTTTG-3'               | Sigma-Aldrich        | FH1_VCAN                |
| <i>VCAN</i> : Reverse, 5'-CAACATAACTTGGAAGGCAG-3'               | Sigma-Aldrich        | RH1_VCAN                |
| <i>GAPDH</i> : Forward, 5'-CTTTTGCCTCGCCAG-3'                   | Sigma-Aldrich        | FH2_GAPDH               |
| <i>GAPDH</i> : Reverse, 5'-TTGATGGCAACAATATCCAC-3'              | Sigma-Aldrich        | RH2_GAPDH               |
| ChIP-qPCR primers:                                              |                      |                         |
| <i>GREB1</i> ERE: Forward, 5'-AGCAGTGAAAAAAGTGTGGCAACTGGG-3'    | Lin et al., 2004     | N/A                     |
| <i>GREB1</i> ERE: Reverse, 5'-CGACCCACAGAAATGAAAAGGCAGCAAACT-3' |                      |                         |
| <i>TFF1</i> ERE3: Forward, 5'-GTCGTTGCCAGCGTTTCC-3'             | This paper           | N/A                     |
| <i>TFF1</i> ERE3: Reverse, 3'-CTTCTCCACGCCCTGTAAATTT-3'         |                      |                         |
| <i>PGR</i> Enhancer: Forward, 5'-GATGACAGAAGGAGAAGTTAGAAG-3'    | This paper           | N/A                     |
| <i>PGR</i> Enhancer: Reverse, 5'-ATATGGCATTGAAGCAACAGG-3'       |                      |                         |
| Chr20 negative region: Forward, 5'-GAGGCTGTGCTTGGAGTAGG-3'      | Carroll et al., 2006 | N/A                     |
| Chr20 negative region: Reverse, 3'-CGTTTCCCCTGTGAAAGGTA-3'      |                      |                         |
| siESR1: Sense, 5'-GAAAGAUUGGCCAGUACCA-3'                        | Sigma-Aldrich        | Oligo#3020649250-000030 |
| siESR1: Antisense, 5'-UGGUACUGGCCAAUCUUUC-3'                    | Sigma-Aldrich        | Oligo#3020649250-000040 |

**Table S4. Sequences of mRNA-qPCR and ChIP-qPCR primers, and siRNA. Related to STAR Methods.**
